# Supplementary material for: Miso Soup Consumption Enhances the Bioavailability of the Reduced Form of Supplemental Coenzyme Q10
Source: Hindawi journal article supplement (doi:10.1155/2020/5349086), 2020-01-07
Supplement: f1 [file 5349086.f1.pdf]

Figure. S1

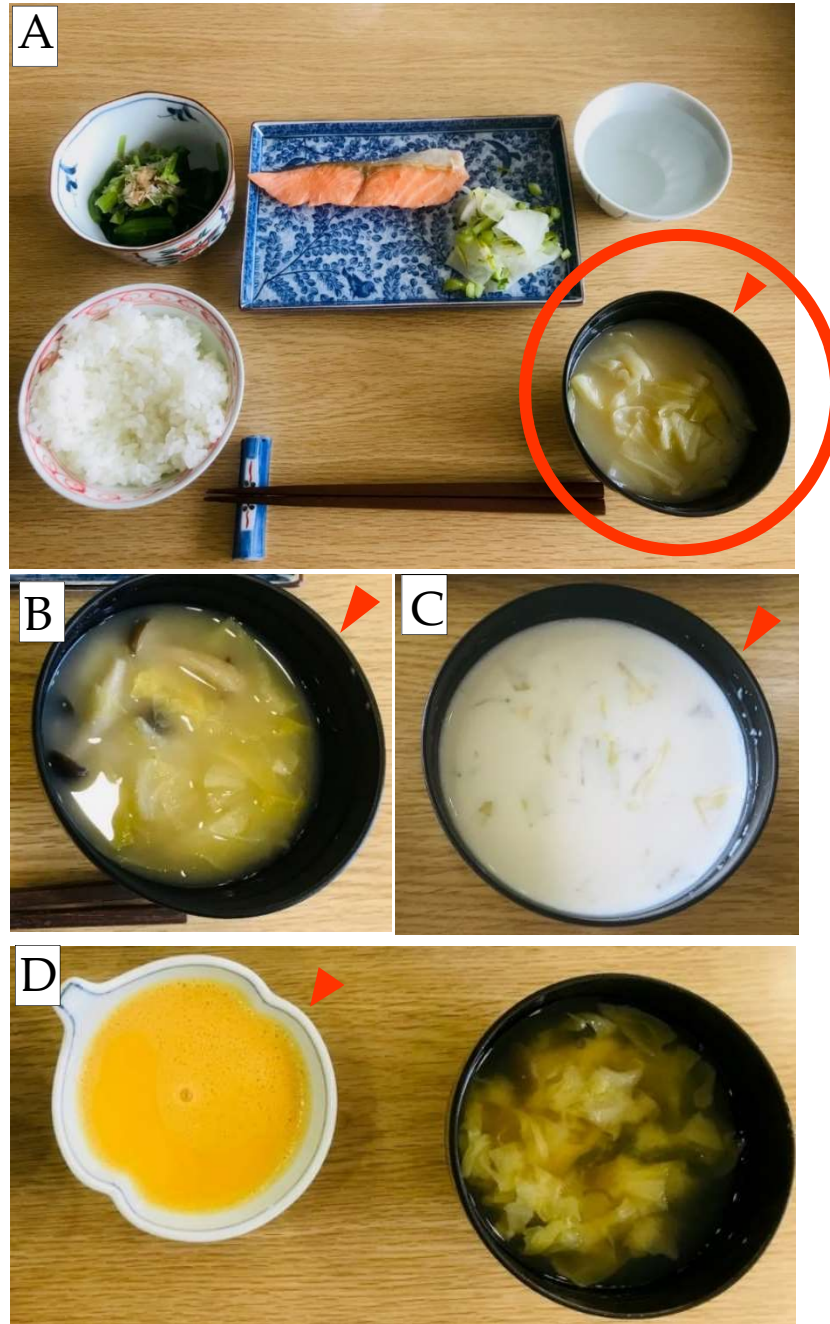

**Figure S1. Meals provided to the participants.**

A, A basic meal, consisting of grilled salmon with Japanese radish marinated in citrus juice (upper right), boiled spinach flavored with bonito flakes and soy sauce (upper left), rice (lower left), and P30-supplemented clear soup with cabbage and mushrooms tasted with salt (lower right, framed by a red circle). The clear soup was replaced with P30-supplemented dishes (B-D) when the test experiments were performed. B, miso soup. C, milk soup. D, stirred raw egg sauce and miso soup. Red arrowheads indicate P30-supplemented menus, which contain 120 mg per serve of the reduced form of CoQ<sub>10</sub>.

Figure. S2

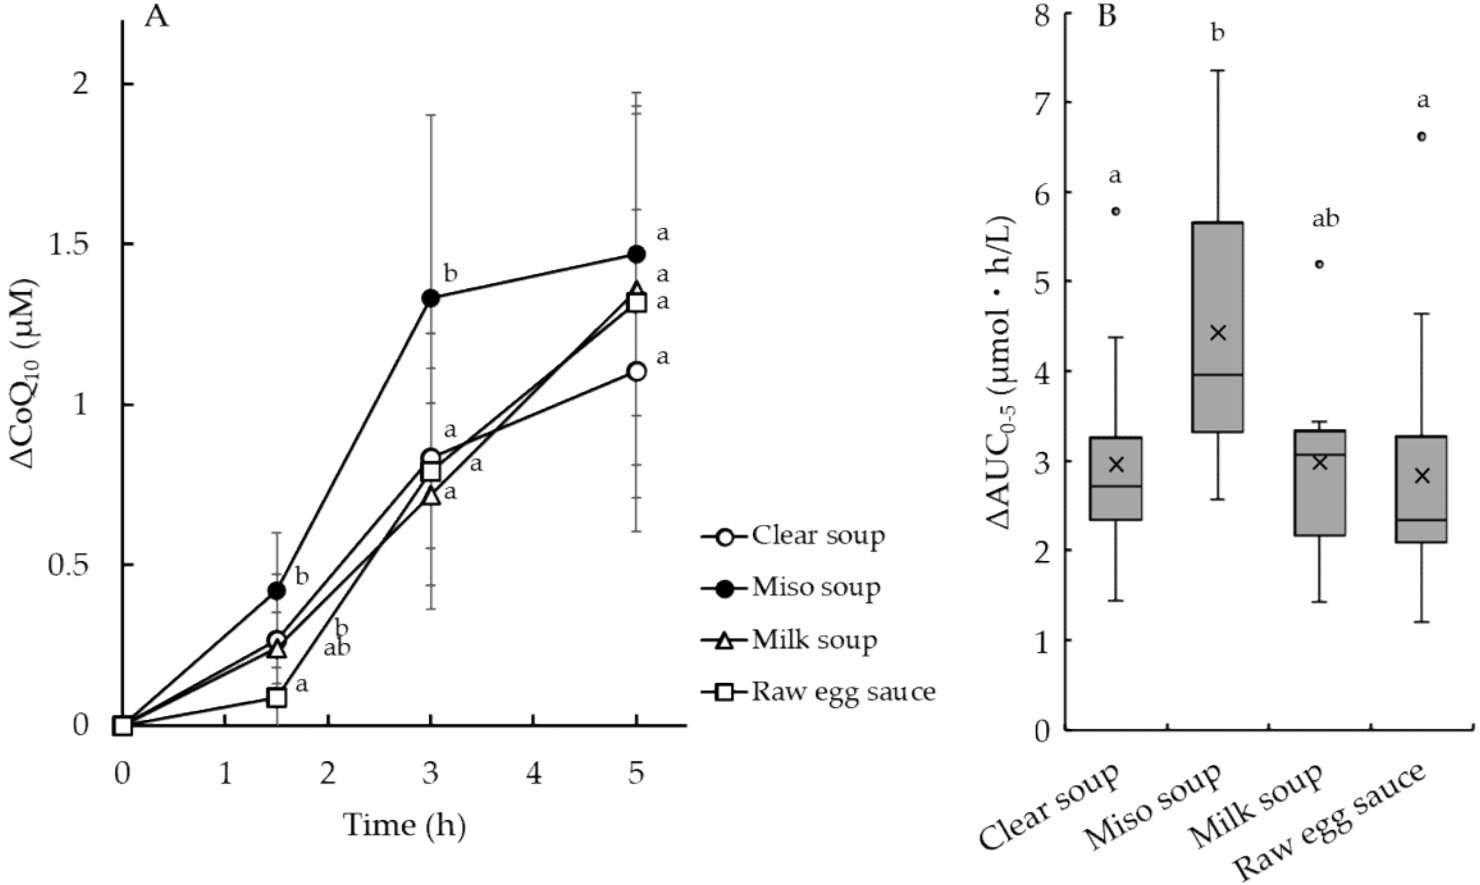

**Figure S2. Changes in serum total CoQ<sub>10</sub> concentration (A) and comparison of ΔAUC<sub>0-5</sub> (B) using unpaired one-way ANOVA.**

A, open circle, P30 in clear soup (n=12); closed circle, P30 in miso soup (n=13); open triangle, P30 in milk soup (n=9); open square, P30 in raw egg sauce (n=13). Data are mean ± SD. B, Box plots of the areas under the serum CoQ<sub>10</sub> concentration-time curves for the 5 h after ingestion (ΔAUC<sub>0-5</sub>) from all subjects. The boundary of the box closest to zero indicates the 25th percentile, the line within the box indicates the median, the multiplication sign within the box indicates the mean, and the boundary of the box farthest from the origin indicates the 75th percentile. Whiskers above and below the box indicate the 10th and 90th percentiles, and the points above and below the whiskers indicate outliers (outwith the 10th and 90th percentiles). Because the number of participants differed in each experiment, the data were analyzed using unpaired one-way ANOVA and the differences between the means were evaluated using Holm-Bonferroni *post hoc* tests. Different lowercase letters indicate significant differences, P<0.05.

**Table S1.** Participation in each of the four experiments.

| Experiment No.         |        |     | 1          | 2         | 3         | 4             | Data used in unpaired one-way ANOVA | Data used in one-way ANOVA with repeated measures |
|------------------------|--------|-----|------------|-----------|-----------|---------------|-------------------------------------|---------------------------------------------------|
| Participant            |        |     | Clear soup | Miso soup | Milk soup | Raw egg sauce |                                     |                                                   |
| ID                     | Sex    | Age |            |           |           |               |                                     |                                                   |
| 1                      | Female | 21  | ○          | ○         |           | ○             | ○                                   |                                                   |
| 2                      | Female | 21  | ○          | ○         |           | ○             | ○                                   |                                                   |
| 3                      | Female | 21  | ○          | ○         | ○         | ○             | ○                                   | ○                                                 |
| 4                      | Female | 21  | ○          | ○         | ○         | ○             | ○                                   | ○                                                 |
| 5                      | Female | 21  | ○          | ○         | ○         | ○             | ○                                   | ○                                                 |
| 6                      | Female | 21  | ○          | ○         |           | ○             | ○                                   |                                                   |
| 7                      | Female | 22  |            | ○         | ○         | ○             | ○                                   |                                                   |
| 8                      | Female | 22  | ○          | ○         | ○         | ○             | ○                                   | ○                                                 |
| 9                      | Female | 22  | ○          | ○         | ○         | ○             | ○                                   | ○                                                 |
| 10                     | Female | 24  | ○          | ○         |           | ○             | ○                                   |                                                   |
| 11                     | Female | 32  | ○          | ○         | ○         | ○             | ○                                   | ○                                                 |
| 12                     | Female | 28  | ○          | ○         | ○         | ○             | ○                                   | ○                                                 |
| 13                     | Male   | 52  | ○          | ○         | ○         | ○             | ○                                   | ○                                                 |
| Number of Participants |        |     | 12         | 13        | 9         | 13            | 13                                  | 8                                                 |

**Table S2.** The increase in serum total CoQ<sub>10</sub> ( $\Delta$ CoQ<sub>10</sub>) concentration and  $\Delta$ AUC<sub>0-5</sub> of each subject after the consumption of each food type

(Experiment 1. Clear soup)

| ID      | CoQ <sub>10</sub> at 0 h (μmol/L) | $\Delta$ CoQ <sub>10</sub> (μmol/L) |           |           |           | $\Delta$ AUC <sub>0-5</sub> (μmol.h/L) |
|---------|-----------------------------------|-------------------------------------|-----------|-----------|-----------|----------------------------------------|
|         |                                   | 0 h                                 | 1.5 h     | 3 h       | 5 h       |                                        |
| 1       | 0.79                              | 0.00                                | 0.09      | 0.87      | 0.81      | 2.46                                   |
| 2       | 0.75                              | 0.00                                | 0.62      | 0.83      | 0.72      | 3.10                                   |
| 3       | 0.45                              | 0.00                                | 0.14      | 0.55      | 0.27      | 1.44                                   |
| 4       | 0.70                              | 0.00                                | 0.19      | 0.86      | 1.53      | 3.31                                   |
| 5       | 0.93                              | 0.00                                | 0.50      | 1.14      | 1.62      | 4.37                                   |
| 6       | 0.57                              | 0.00                                | 0.17      | 1.09      | 0.81      | 2.98                                   |
| 7       |                                   |                                     |           |           |           |                                        |
| 8       | 0.62                              | 0.00                                | 0.12      | 0.67      | 0.98      | 2.34                                   |
| 9       | 0.77                              | 0.00                                | 0.68      | 1.48      | 2.18      | 5.78                                   |
| 10      | 0.61                              | 0.00                                | 0.23      | 0.63      | 0.93      | 2.38                                   |
| 11      | 0.53                              | 0.00                                | 0.21      | 0.40      | 0.86      | 1.86                                   |
| 12      | 0.47                              | 0.00                                | 0.25      | 0.64      | 0.95      | 2.45                                   |
| 13      | 0.95                              | 0.00                                | 0.01      | 0.85      | 1.61      | 3.13                                   |
| Mean±SD | 0.68±0.16                         | 0                                   | 0.27±0.20 | 0.84±0.28 | 1.11±0.50 | 2.97±1.11                              |

(Experiment 2. Miso soup)

| ID      | CoQ <sub>10</sub> at 0 h (μmol/L) | $\Delta$ CoQ <sub>10</sub> (μmol/L) |           |           |           | $\Delta$ AUC <sub>0-5</sub> (μmol.h/L) |
|---------|-----------------------------------|-------------------------------------|-----------|-----------|-----------|----------------------------------------|
|         |                                   | 0 h                                 | 1.5 h     | 3 h       | 5 h       |                                        |
| 1       | 0.80                              | 0.00                                | 0.36      | 0.83      | 1.64      | 3.63                                   |
| 2       | 0.79                              | 0.00                                | 0.45      | 0.64      | 1.07      | 2.89                                   |
| 3       | 0.51                              | 0.00                                | 0.55      | 1.68      | 1.57      | 5.33                                   |
| 4       | 0.73                              | 0.00                                | 0.27      | 1.12      | 1.60      | 3.97                                   |
| 5       | 1.12                              | 0.00                                | 0.43      | 2.21      | 1.71      | 6.21                                   |
| 6       | 0.83                              | 0.00                                | 0.21      | 1.29      | 0.89      | 3.47                                   |
| 7       | 0.86                              | 0.00                                | 0.56      | 1.26      | 1.69      | 4.73                                   |
| 8       | 0.99                              | 0.00                                | 0.56      | 2.29      | 1.13      | 5.98                                   |
| 9       | 1.00                              | 0.00                                | 0.37      | 2.21      | 2.92      | 7.35                                   |
| 10      | 0.73                              | 0.00                                | 0.65      | 0.89      | 0.91      | 3.45                                   |
| 11      | 0.70                              | 0.00                                | 0.37      | 0.87      | 1.14      | 3.21                                   |
| 12      | 0.67                              | 0.00                                | 0.68      | 1.38      | 1.47      | 4.89                                   |
| 13      | 1.05                              | 0.00                                | 0.00      | 0.69      | 1.37      | 2.57                                   |
| Mean±SD | 0.83±0.17                         | 0                                   | 0.42±0.18 | 1.33±0.57 | 1.47±0.50 | 4.44±1.46                              |

(Experiment 3. Milk soup)

| ID      | CoQ <sub>10</sub> at 0 h (μmol/L) | $\Delta$ CoQ <sub>10</sub> (μmol/L) |           |           |           | $\Delta$ AUC <sub>0-5</sub> (μmol.h/L) |
|---------|-----------------------------------|-------------------------------------|-----------|-----------|-----------|----------------------------------------|
|         |                                   | 0 h                                 | 1.5 h     | 3 h       | 5 h       |                                        |
| 1       |                                   |                                     |           |           |           |                                        |
| 2       |                                   |                                     |           |           |           |                                        |
| 3       | 0.56                              | 0.00                                | 0.30      | 0.80      | 1.08      | 2.93                                   |
| 4       | 0.60                              | 0.00                                | 0.18      | 0.85      | 1.67      | 3.44                                   |
| 5       | 1.20                              | 0.00                                | 0.24      | 1.24      | 2.66      | 5.20                                   |
| 6       |                                   |                                     |           |           |           |                                        |
| 7       | 0.64                              | 0.00                                | 0.38      | 0.82      | 1.23      | 3.23                                   |
| 8       | 0.55                              | 0.00                                | 0.11      | 0.28      | 0.76      | 1.43                                   |
| 9       | 0.88                              | 0.00                                | 0.31      | 0.63      | 1.66      | 3.23                                   |
| 10      |                                   |                                     |           |           |           |                                        |
| 11      | 0.49                              | 0.00                                | 0.33      | 0.26      | 0.83      | 1.78                                   |
| 12      | 0.50                              | 0.00                                | 0.31      | 0.86      | 1.10      | 3.07                                   |
| 13      | 0.72                              | 0.00                                | 0.02      | 0.73      | 1.24      | 2.55                                   |
| Mean±SD | 0.68±0.22                         | 0                                   | 0.24±0.11 | 0.72±0.29 | 1.36±0.55 | 2.98±1.02                              |

(Experiment 4. Raw Egg Sauce)

| ID      | CoQ <sub>10</sub> at 0 h (μmol/L) | $\Delta$ CoQ <sub>10</sub> (μmol/L) |           |           |           | $\Delta$ AUC <sub>0-5</sub> (μmol.h/L) |
|---------|-----------------------------------|-------------------------------------|-----------|-----------|-----------|----------------------------------------|
|         |                                   | 0 h                                 | 1.5 h     | 3 h       | 5 h       |                                        |
| 1       | 1.07                              | 0.00                                | 0.00      | 0.73      | 0.79      | 2.06                                   |
| 2       | 0.87                              | 0.00                                | 0.22      | 1.10      | 1.40      | 3.66                                   |
| 3       | 0.64                              | 0.00                                | 0.01      | 0.85      | 1.36      | 2.87                                   |
| 4       | 0.65                              | 0.00                                | 0.20      | 0.45      | 0.89      | 1.98                                   |
| 5       | 0.93                              | 0.00                                | 0.21      | 1.85      | 3.06      | 6.62                                   |
| 6       | 0.94                              | 0.00                                | 0.23      | 0.56      | 0.90      | 2.21                                   |
| 7       | 0.92                              | 0.00                                | 0.00      | 0.54      | 1.30      | 2.24                                   |
| 8       | 0.70                              | 0.00                                | 0.10      | 0.72      | 1.21      | 2.62                                   |
| 9       | 1.11                              | 0.00                                | 0.00      | 1.52      | 1.98      | 4.64                                   |
| 10      | 0.75                              | 0.00                                | 0.05      | 0.57      | 1.27      | 2.34                                   |
| 11      | 0.76                              | 0.00                                | 0.11      | 0.32      | 0.48      | 1.20                                   |
| 12      | 0.82                              | 0.00                                | 0.02      | 0.61      | 1.27      | 2.37                                   |
| 13      | 1.01                              | 0.00                                | 0.00      | 0.49      | 1.26      | 2.12                                   |
| Mean±SD | 0.86±0.15                         | 0                                   | 0.09±0.09 | 0.79±0.43 | 1.32±0.61 | 2.84±1.36                              |
